# Supplementary material for: Duration of Reproductive Life Span, Age at Menarche, and Age at Menopause Are Associated With Risk of Cardiovascular Disease in Women
Source: PubMed Central journal article supplement — J Am Heart Assoc. 2017 Nov 2;6(11):e006713. doi: 10.1161/JAHA.117.006713 (PMC5721766; doi:10.1161/jaha.117.006713), 2017-11-02
Supplement: JAH3-6-e006713-s001.pdf [file JAH3-6-e006713-s001.pdf]

# **SUPPLEMENTAL MATERIAL**

**Table S1.** Relative risk and 95% confidence intervals of ischemic and hemorrhagic stroke according to reproductive lifespan in the Nurses' Health Study

|                           | Reproductive lifespan (years) |                   |                   |                   |                   | p-trend |
|---------------------------|-------------------------------|-------------------|-------------------|-------------------|-------------------|---------|
|                           | <30                           | 30-33             | 34-37             | 38-41             | ≥42               |         |
| Ischemic stroke           |                               |                   |                   |                   |                   |         |
| <i>Cases/person-years</i> | <i>124/144040</i>             | <i>144/192701</i> | <i>388/455685</i> | <i>446/513373</i> | <i>135/164763</i> |         |
| Age adjusted              | 1.33 (1.04-1.71)              | 1.05 (0.83-1.33)  | 1.11 (0.91-1.35)  | 1.06 (0.88-1.29)  | 1                 | 0.04    |
| Multivariate-adjusted*    | 1.21 (0.93-1.59)              | 1.01 (0.79-1.29)  | 1.09 (0.89-1.33)  | 1.08 (0.89-1.30)  | 1                 | 0.32    |
| Hemorrhagic stroke        |                               |                   |                   |                   |                   |         |
| <i>Cases/person-years</i> | <i>28/144127</i>              | <i>37/192808</i>  | <i>61/456004</i>  | <i>65/513740</i>  | <i>22/164864</i>  |         |
| Age adjusted              | 1.56 (1.88-2.75)              | 1.43 (0.84-2.44)  | 0.96 (0.59-1.58)  | 0.92 (0.56-1.49)  | 1                 | 0.01    |
| Multivariate-adjusted*    | 1.37 (0.73-2.56)              | 1.27 (0.73-2.21)  | 0.88 (0.53-1.45)  | 0.88 (0.54-1.43)  | 1                 | 0.09    |

\* additionally adjusted for ethnicity (European descent, Asian, Hispanic, African American), hormone therapy use (never, current, past), oral contraceptive use (never, ever), parity (nulliparous, 1-2, ≥3), family history of stroke, smoking (never, past, current 1-14, 15-24, or ≥25 cigarettes/d), moderate to vigorous exercise (0, 0.01-1.0, 1.1-3.4, 3.5-5.9, ≥6 h/wk), Alternate Healthy Eating Index score (<45, 45-<60, ≥60), Aspirin use (yes, no), alcohol intake (0, 0.1-4.9, 5.0-14.9, ≥15.0 g/d), BMI (<18.5, 18.5-22.4, 22.5-24.9, 25.0-27.4, 27.5-29.9, 30.0-34.9, ≥35.0 kg/m<sup>2</sup>), BMI at age 18 years (<18.5, 18.5-22.4, 22.5-24.9, 25.0-27.4, 27.5-29.9, 30.0-34.9, ≥35.0 kg/m<sup>2</sup>), menopause type (natural, surgical), a history of diabetes, hypertension, hypercholesterolemia

**Table S2.** Relative risk and 95% confidence intervals of total CVD according to reproductive lifespan in the Nurses' Health Study stratified by menopause type

|                           | Reproductive lifespan (years) |                   |                    |                    |                   | p-trend |
|---------------------------|-------------------------------|-------------------|--------------------|--------------------|-------------------|---------|
|                           | <30                           | 30-33             | 34-37              | 38-41              | ≥42               |         |
| Natural menopause         |                               |                   |                    |                    |                   |         |
| <i>Cases/person-years</i> | <i>186/38977</i>              | <i>473/118277</i> | <i>1388/375762</i> | <i>1697/466701</i> | <i>558/154726</i> |         |
| Age adjusted              | 1.42 (1.20-1.68)              | 1.21 (1.07-1.37)  | 1.06 (0.96-1.17)   | 1.00 (0.91-1.10)   | 1                 | <0.0001 |
| Multivariate-adjusted*    | 1.33 (1.13-1.58)              | 1.16 (1.02-1.31)  | 1.05 (0.95-1.16)   | 1.01 (0.92-1.11)   | 1                 | 0.0001  |
| Surgical menopause        |                               |                   |                    |                    |                   |         |
| <i>Cases/person-years</i> | <i>383/104779</i>             | <i>252/74047</i>  | <i>272/79125</i>   | <i>165/45833</i>   | <i>30/9761</i>    |         |
| Age adjusted              | 1.61 (1.11-2.34)              | 1.31 (0.90-1.91)  | 1.22 (0.84-1.78)   | 1.21 (0.82-1.79)   | 1                 | <0.0001 |
| Multivariate-adjusted*    | 1.38 (0.95-2.01)              | 1.18 (0.81-2.01)  | 1.15 (0.78-1.68)   | 1.16 (0.78-1.71)   | 1                 | 0.001   |

\* additionally adjusted for ethnicity (European descent, Asian, Hispanic, African American), hormone therapy use (never, current, past), oral contraceptive use (never, ever), parity (nulliparous, 1-2, ≥3), family history of MI, family history of stroke, [smoking (never, past, current 1-14, 15-24, or ≥25 cigarettes/d)], moderate to vigorous exercise (0, 0.01-1.0, 1.1-3.4, 3.5-5.9, ≥6 h/wk), Alternate Healthy Eating Index score (<45, 45-<60, ≥60), Aspirin use (yes, no), alcohol intake (0, 0.1-4.9, 5.0-14.9, ≥15.0 g/d), BMI (<18.5, 18.5-22.4, 22.5-24.9, 25.0-27.4, 27.5-29.9, 30.0-34.9, ≥35.0 kg/m<sup>2</sup>), BMI at age 18 years (<18.5, 18.5-22.4, 22.5-24.9, 25.0-27.4, 27.5-29.9, 30.0-34.9, ≥35.0 kg/m<sup>2</sup>), [menopause type (natural, surgical)], a history of diabetes, hypertension, hypercholesterolemia  
p for interaction is >0.05 between menopause type and reproductive lifespan or between smoking and reproductive lifespan.

**Table S3.** Sensitivity analysis of relative risk and 95% confidence intervals of total CVD according to reproductive lifespan in the Nurses' Health Study participants who were in postmenopausal status in 1980

|                           | Reproductive lifespan (years) |                   |                    |                    |                  | p-trend |
|---------------------------|-------------------------------|-------------------|--------------------|--------------------|------------------|---------|
|                           | <30                           | 30-33             | 34-37              | 38-41              | ≥42              |         |
| <i>Cases/person-years</i> | <i>598/13188</i>              | <i>624/127811</i> | <i>1275/240172</i> | <i>1169/206681</i> | <i>202/34592</i> |         |
| Age adjusted              | 1.33 (1.13-1.68)              | 1.15 (0.98-1.36)  | 1.11 (0.95-1.29)   | 1.06 (0.91-1.23)   | 1                | <0.0001 |
| Multivariate-adjusted*    | 1.33 (1.12-1.59)              | 1.17 (0.99-1.38)  | 1.13 (0.97-1.32)   | 1.08 (0.93-1.26)   | 1                | 0.0003  |

\* additionally adjusted for ethnicity (European descent, Asian, Hispanic, African American), hormone therapy use (never, current, past), oral contraceptive use (never, ever), parity (nulliparous, 1-2, ≥3), family history of MI, family history of stroke, [smoking (never, past, current 1-14, 15-24, or ≥25 cigarettes/d)], moderate to vigorous exercise (0, 0.01-1.0, 1.1-3.4, 3.5-5.9, ≥6 h/wk), Alternate Healthy Eating Index score (<45, 45-<60, ≥60), Aspirin use (yes, no), alcohol intake (0, 0.1-4.9, 5.0-14.9, ≥15.0 g/d), BMI (<18.5, 18.5-22.4, 22.5-24.9, 25.0-27.4, 27.5-29.9, 30.0-34.9, ≥35.0 kg/m<sup>2</sup>), BMI at age 18 years (<18.5, 18.5-22.4, 22.5-24.9, 25.0-27.4, 27.5-29.9, 30.0-34.9, ≥35.0 kg/m<sup>2</sup>), menopause type (natural, surgical), a history of diabetes, hypertension, hypercholesterolemia

**Table S4.** Sensitivity analysis of relative risk and 95% confidence intervals of total CVD according to age at menopause in the Nurses' Health Study participants who were in premenopausal in 1980

|                           | Age at menopause (years) |                  |                  |             |                  |         |
|---------------------------|--------------------------|------------------|------------------|-------------|------------------|---------|
|                           | <40                      | 40-44            | 45-49            | 50-54       | ≥55              | p-trend |
| <i>Cases/person-years</i> | 8/5902                   | 75/41089         | 465/212575       | 1022/410844 | 288/91190        |         |
| Age adjusted              | 1.71 (0.84-3.50)         | 1.40 (1.09-1.79) | 1.13 (1.00-1.27) | 1           | 1.01 (0.88-1.17) | 0.004   |
| Multivariate-adjusted*    | 1.67 (0.81-3.44)         | 1.28 (0.99-1.65) | 1.06 (0.94-1.19) | 1           | 1.05 (0.91-1.21) | 0.12    |

\*adjusted for ethnicity (European descent, Asian, Hispanic, African American), hormone therapy use (never, current, past), oral contraceptive use (never, ever), parity (nulliparous, 1-2, ≥3), family history of MI (excluded in stroke outcome analysis), family history of stroke (excluded in CHD outcome analysis), smoking (never, past, current 1-14, 15-24, or ≥25 cigarettes/d), moderate to vigorous exercise (0, 0.01-1.0, 1.1-3.4, 3.5-5.9, ≥6 h/wk), Alternate Healthy Eating Index score (<45, 45-<60, ≥60), Aspirin use (yes, no), alcohol intake (0, 0.1-4.9, 5.0-14.9, ≥15.0 g/d), BMI (<18.5, 18.5-22.4, 22.5-24.9, 25.0-27.4, 27.5-29.9, 30.0-34.9, ≥35.0 kg/m<sup>2</sup>), BMI at age 18 years (<18.5, 18.5-22.4, 22.5-24.9, 25.0-27.4, 27.5-29.9, 30.0-34.9, ≥35.0 kg/m<sup>2</sup>), menopause type (natural, surgical), a history of diabetes, hypertension, hypercholesterolemia
